# Supplementary material for: A series of new vanadium(iii) chalcogenido-antimonates: an unusual seven-coordinate nitro-selenidovanadium(iii) complex
Source: Royal Society of Chemistry journal article supplement (doi:10.1039/c9dt00268e), 2019-01-01
Supplement: c9dt00268e1.pdf [file c9dt00268e1.pdf]

## A series of new vanadium(III) chalcogenidoantimonates: unusual seven-coordinate nitro-selenidovanadium(III) complex

Hai-Ying Luo, Jian Zhou, and Hua-Hong Zou

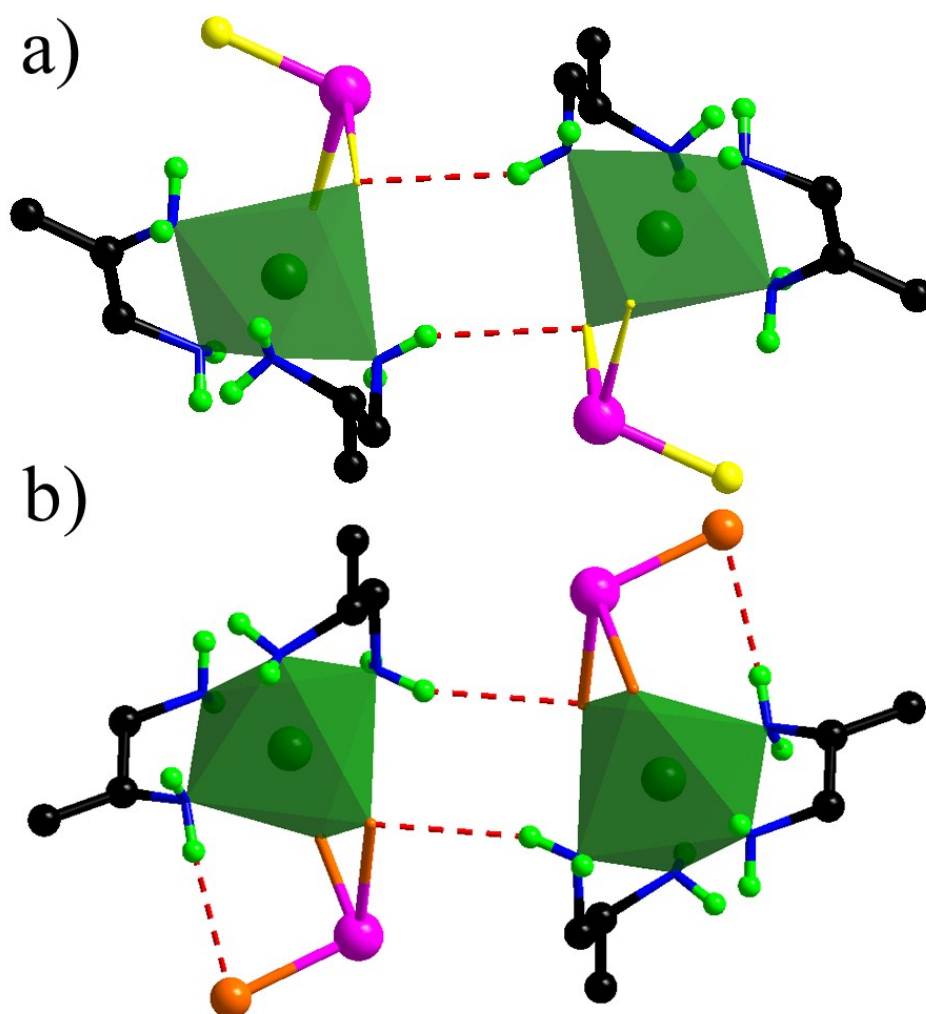

Fig. S1 Two adjacent inversion-related  $[V^{III}(dap)_2SbQ_3]$  molecules are bridged by N-H $\cdots$ Q H-bonds in **1** (a) and **2** (b).

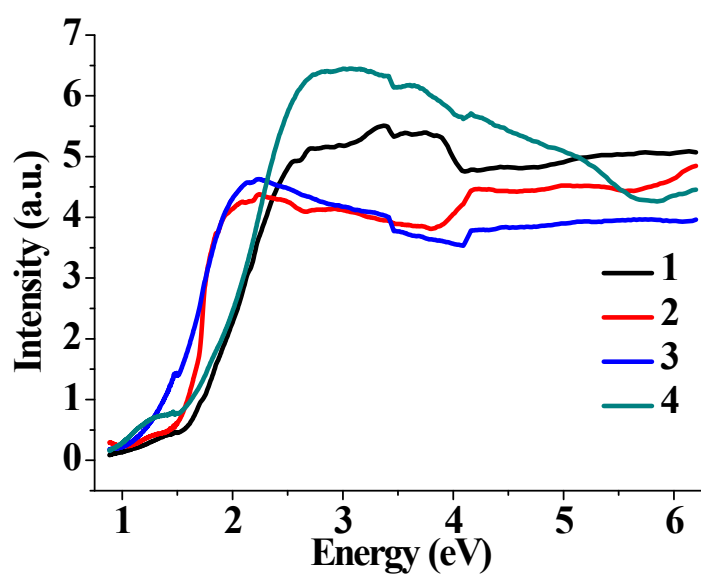

Fig. S2 UV-vis absorption spectra of 1–4.

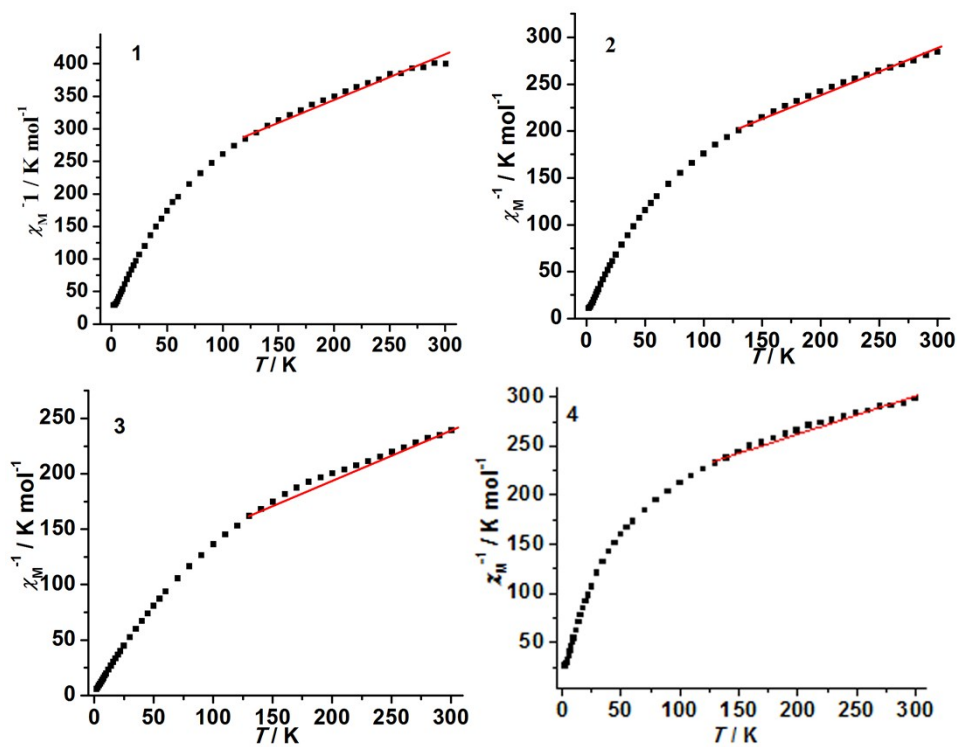

Fig. S3 Plot of  $\chi_M^{-1}$  versus T for 1-4.

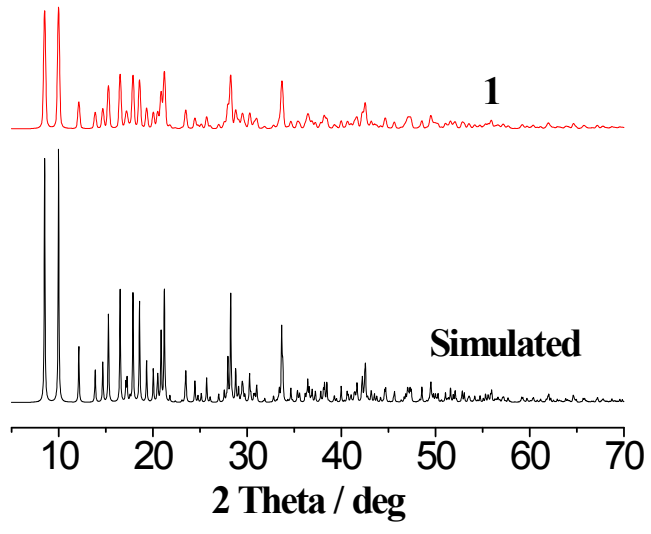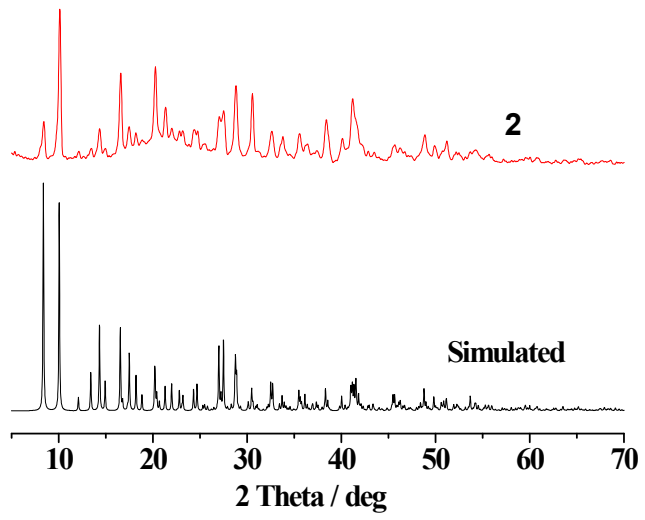

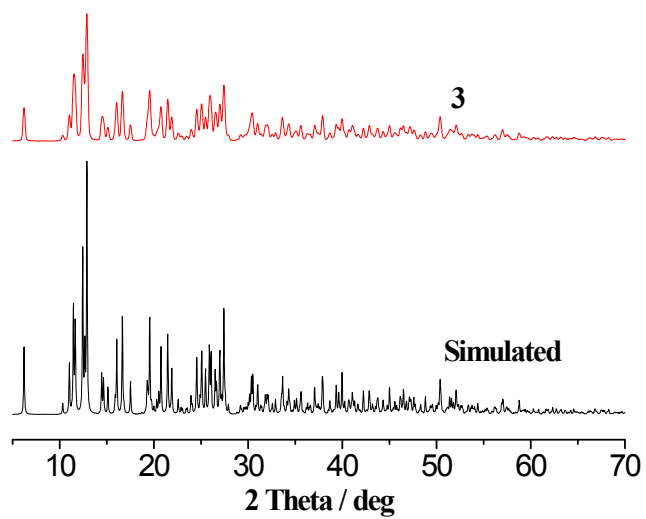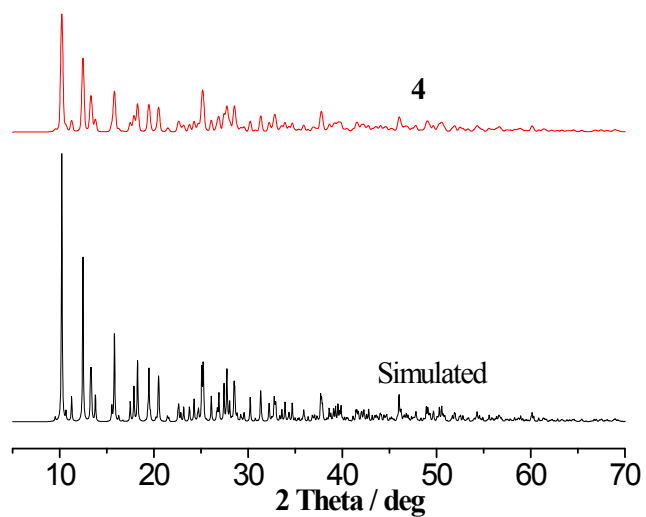

Fig. S4 Simulated and experimental powder XRD patterns of **1-4**.
